# Supplementary material
Source: Elsevier journal article supplement (https://www.sciencedirect.com/science/article/pii/S2173574316000381)
Supplement: mmc1 [file S2173574316000381:mmc1.pdf]

## Material Complementario

### Gradación del Dolor Crónico basado en la Escala de Gradación del Dolor Crónico

| <b>GRADACIÓN DEL DOLOR CRÓNICO basado en la EGDC</b> |                                                                                              |
|------------------------------------------------------|----------------------------------------------------------------------------------------------|
| <b>SIN DOLOR</b>                                     |                                                                                              |
| <b>GRADO 0</b>                                       | No hay Problemas de Dolor (últimos seis meses)                                               |
| <b>BAJA INTERFERENCIA</b>                            |                                                                                              |
| <b>GRADO I - Baja Intensidad</b>                     | Características Intensidad Dolor menor de 15 y Puntos 4 ítems Discapacidad menos de 17.      |
| <b>GRADO II – Alta Intensidad</b>                    | Características de Intensidad Dolor de 15 o mayor y Puntos 4 ítems Discapacidad menos de 17. |
| <b>ALTA INTERFERENCIA</b>                            |                                                                                              |
| <b>GRADO III – Moderadamente limitante</b>           | Puntos 4 ítems Discapacidad of 17 a 24.                                                      |
| <b>GRADO IV – Severamente limitante</b>              | Puntos 4 ítems Discapacidad of 25 a 40                                                       |

| <b>CLASIFICACIÓN DE PERSISTENCIA</b> |                                    |
|--------------------------------------|------------------------------------|
| <b>DOLOR NO PERSISTENTE</b>          | 1-89 Días con Dolor (Pregunta 1)   |
| <b>DOLOR PERSISTENTE</b>             | 90-180 Días con Dolor (Pregunta 1) |
